# Supplementary material for: Atmospheric deposition of polybrominated dibenzo-p-dioxins and dibenzofurans in Guangzhou, China: seasonal variations and sources
Source: Royal Society of Chemistry journal article supplement (doi:10.1039/c1em10195a), 2011-01-01
Supplement: c1em10195a.pdf [file c1em10195a.pdf]

## Supplementary Information

### **Atmospheric deposition of polybrominated dibenzo-*p*-dioxins and dibenzofurans in Guangzhou, China: seasonal variations and sources**

By

Man Ren<sup>a,b,\*</sup>, Lin Zhou<sup>a</sup>, De Yi Chen<sup>a</sup>, Ying Cai<sup>b</sup>

*<sup>a</sup>State Key Laboratory of Organic Geochemistry, Guangzhou Institute of Geochemistry, Chinese Academy of Sciences, Guangzhou 510640, China*

*<sup>b</sup>Research Center of the Pearl River Delta Environmental Pollution and Control, Guangzhou 510640, China*

\* Corresponding author

Tel.: +86-20-85290283, Fax: +86-20-85290706,

E-mail address: renmanrm@163.com.

#### **Contents**

#### **Method. Extract cleanup for co-analysis of PBDD/Fs and PCDD/Fs**

**Table S1. Deposition fluxes ( $\text{pg d}^{-1} \text{m}^{-2}$ ) of PBDD/Fs and PCDD/Fs in Guangzhou, China**

**Table S2. Relative proportion (%) of PBDD/Fs in bulk deposition and sources**

This Section Contains 2 Tables and 4 Pages

**Method: Extract cleanup for co-analysis of PBDD/Fs and PCDD/Fs**

Extract cleanup was accomplished successively with the following steps: (1) Sample extracts were pre-cleaned with 20 g 40% H<sub>2</sub>SO<sub>4</sub>/silica gel (70-230 mesh, Merck, Germany) in 100 mL hexane (Merck, Germany, pesticide quality grade), and stirred for 2 h. The entire content of the flask was filtered through a funnel with glass wool covered with 10 g Na<sub>2</sub>SO<sub>4</sub>. One hundred milliliters of hexane was used to rinse the flask and the slurry. (2) The filtrates were further cleaned on a multi-layer silica gel column (from up to bottom, containing 1 cm Na<sub>2</sub>SO<sub>4</sub>, 2 g neutral silica gel, 8 g 40% H<sub>2</sub>SO<sub>4</sub>/silica gel, 1 g neutral silica gel, 4 g 33% KOH/silica gel, 1 g neutral silica gel and glass wool), eluted successively with 20 mL hexane (to be discarded) and 100 mL 3% dichloromethane (Merck, Germany, pesticide quality grade)/hexane. (3) Finally the extract was loaded on a florisil (1g) column, eluted successively with 15 mL 5:95 dichloromethane/hexane (dioxin like-PCBs fraction) and 100 mL 1:1 dichloromethane/hexane (PCDD/Fs and PBDD/Fs fraction).

The last fraction were respectively concentrated with rotary evaporator, transferred into a 1.5 ml tear-drop vial, and then concentrated further with N<sub>2</sub>, finally added with corresponding recovery standards. They were determined with GC/HRMS.

**Table S1. Deposition fluxes ( $\text{pg d}^{-1} \text{m}^{-2}$ ) of PBDD/Fs and PCDD/Fs in Guangzhou, China<sup>a</sup>**

|                                  |       |       |       |       |       |       |       |       |       |       |       |       |
|----------------------------------|-------|-------|-------|-------|-------|-------|-------|-------|-------|-------|-------|-------|
| Time (month/year)                | 04/05 | 05/05 | 06/05 | 07/05 | 08/05 | 09/05 | 10/05 | 11/05 | 12/05 | 01/06 | 02/06 | 03/06 |
| Rainfall (mm)                    | 209.1 | 395.2 | 581.5 | 131.5 | 371.2 | 128.9 | 0.0   | 2.6   | 1.6   | 9.5   | 99.3  | 96.6  |
| Temperature (°C)                 | 22.6  | 27.3  | 27.9  | 29.9  | 28.7  | 28.5  | 25.8  | 22.2  | 15.1  | 15.8  | 17.3  | 17.9  |
| Sample No.                       | Yc4   | Yc5   | Yc6   | Yc7   | Yc8   | Yc9   | Yc10  | Yc11  | Yc12  | Yc13  | Yc14  | Yc15  |
| 2378-TBDF                        | 36.4  | 45.8  | 44.4  | 36.6  | 43.7  | 21.5  | 13.8  | 8.2   | 5.7   | 8.2   | 9.0   | 11.6  |
| 12378-PeBDF                      | 15.1  | 17.3  | 18.6  | 14.3  | 22.3  | 8.2   | 5.5   | 5.9   | 3.0   | 3.6   | 4.2   | 5.8   |
| 23478-PeBDF                      | 22.3  | 12.7  | 28.9  | 23.9  | 26.1  | 14.0  | 12.0  | 6.5   | 4.8   | 4.9   | 6.5   | 6.7   |
| 2378-TBDD                        | 1.3   | 2.4   | 2.3   | 0.9   | 3.1   | 0.6   | 0.4   | 0.1   | 0.1   | 0.4   | 0.2   | 0.7   |
| 12378-PeBDD                      | 0.6   | 0.5   | 0.7   | 0.9   | 1.1   | 0.4   | ND    | 0.1   | 0.3   | 0.2   | 0.1   | 0.3   |
| 123478/123678-HxBDD              | ND    | ND    | 1.0   | 2.4   | 2.3   | 0.8   | 0.3   | 0.3   | 0.5   | 0.3   | 0.3   | 0.1   |
| 123789-HxBDD                     | 0.7   | ND    | 1.0   | 1.4   | 2.3   | ND    | 0.2   | 0.3   | 0.5   | 0.3   | 0.2   | 0.3   |
| $\Sigma$ 2378-PBDD/Fs            | 76.4  | 78.7  | 96.9  | 80.4  | 100.9 | 45.6  | 32.3  | 21.5  | 14.9  | 17.7  | 20.4  | 25.5  |
| I-TEQ (PBDD/Fs)                  | 17.2  | 14.5  | 22.6  | 18.0  | 22.7  | 10.5  | 8.1   | 4.6   | 3.5   | 3.9   | 4.6   | 5.7   |
| $\Sigma$ 2378-PCDD/Fs            | 595   | 863   | 537   | 272   | 427   | 262   | 215   | 295   | 263   | 541   | 556   | 639   |
| $\Sigma$ PCDD/Fs                 | 1953  | 2809  | 1581  | 2235  | 3325  | 829   | 590   | 798   | 729   | 1092  | 1680  | 2246  |
| WHO <sub>98</sub> -TEQ (PCDD/Fs) | 31.4  | 50.3  | 24.8  | 31.5  | 46.5  | 14.0  | 8.3   | 9.8   | 8.9   | 10.3  | 21.7  | 32.1  |
| I-TEQ (PCDD/Fs)                  | 29.0  | 46.9  | 22.9  | 29.2  | 43.5  | 12.7  | 7.9   | 9.0   | 8.3   | 9.5   | 20.1  | 29.5  |
| Time (month/year)                | 04/05 | 05/05 | 06/05 | 07/05 | 08/05 | 09/05 | 10/05 | 11/05 | 12/05 | 01/06 | 02/06 | 03/06 |
| Sample No.                       | Ws4   | Ws5   | Ws6   | Ws7   | Ws8   | Ws9   | Ws10  | Ws11  | Ws12  | Ws13  | Ws14  | Ws15  |
| 2378-TBDF                        | 32.3  | 42.1  | 48.4  | 25.1  | 32.4  | 25.7  | 12.3  | 7.9   | 9.6   | 7.6   | 4.7   | 8.0   |
| 12378-PeBDF                      | 10.4  | 25.9  | 22.6  | 9.2   | 19.9  | 12.7  | 2.9   | 3.1   | 4.6   | 4.2   | 2.8   | 4.2   |
| 23478-PeBDF                      | 14.0  | 34.7  | 32.4  | 13.8  | 26.7  | 21.7  | 6.7   | 5.9   | 6.8   | 6.3   | 4.2   | 6.2   |
| 2378-TBDD                        | 0.9   | 2.0   | 2.0   | 1.0   | 1.6   | 0.8   | 0.3   | 0.2   | 0.4   | ND    | ND    | ND    |
| 12378-PeBDD                      | ND    | 1.0   | ND    | 0.7   | 0.8   | 0.7   | 0.3   | 0.2   | 0.2   | ND    | ND    | ND    |
| 123478/123678-HxBDD              | ND    | 1.9   | 7.6   | 1.4   | 1.5   | 1.2   | 0.3   | 0.9   | 0.7   | 0.7   | ND    | ND    |
| 123789-HxBDD                     | ND    | 1.3   | 2.4   | 1.5   | 1.0   | 0.5   | ND    | 1.6   | 0.5   | 0.6   | ND    | ND    |
| $\Sigma$ 2378-PBDD/Fs            | 57.5  | 108.9 | 115.2 | 52.5  | 83.8  | 63.4  | 22.7  | 19.9  | 22.7  | 19.7  | 12.6  | 19.0  |
| I-TEQ (PBDD/Fs)                  | 11.6  | 25.7  | 25.1  | 11.4  | 19.8  | 15.4  | 5.2   | 4.5   | 5.1   | 4.5   | 3.0   | 4.4   |
| $\Sigma$ 2378-PCDD/Fs            | 779   | 689   | 592   | 587   | 874   | 220   | 214   | 284   | 336   | 302   | 704   | 551   |
| $\Sigma$ PCDD/Fs                 | 2912  | 2379  | 1760  | 1487  | 2337  | 675   | 568   | 735   | 769   | 880   | 1546  | 2084  |
| WHO <sub>98</sub> -TEQ (PCDD/Fs) | 33.2  | 41.2  | 26.8  | 20.1  | 31.8  | 11.0  | 8.6   | 10.3  | 8.2   | 10.3  | 16.5  | 25.4  |
| I-TEQ (PCDD/Fs)                  | 30.3  | 37.7  | 24.7  | 18.8  | 29.3  | 9.8   | 8.1   | 9.4   | 7.7   | 9.4   | 15.3  | 23.1  |
| Time (month/year)                | 04/05 | 05/05 | 06/05 | 07/05 | 08/05 | 09/05 | 10/05 | 11/05 | 12/05 | 01/06 | 02/06 | 03/06 |
| Sample No.                       | Hz4   | Hz5   | Hz6   | Hz7   | Hz8   | Hz9   | Hz10  | Hz11  | Hz12  | Hz13  | Hz14  | Hz15  |
| 2378-TBDF                        | 31.9  | 43.7  | 75.3  | 25.2  | 31.2  | 17.0  | 14.4  | 6.0   | 5.2   | 6.1   | 5.7   | 7.7   |
| 12378-PeBDF                      | 12.6  | 29.1  | 27.4  | 11.7  | 13.0  | 5.4   | 4.7   | 2.8   | 2.4   | 2.8   | 3.1   | 3.3   |
| 23478-PeBDF                      | 16.3  | 22.4  | 34.5  | 23.5  | 16.8  | 10.8  | 9.1   | 4.3   | 4.4   | 5.1   | 4.5   | 4.7   |
| 2378-TBDD                        | 1.5   | 2.4   | 1.7   | 1.0   | 1.5   | 0.5   | 0.3   | ND    | ND    | ND    | ND    | 0.5   |
| 12378-PeBDD                      | 0.8   | 4.3   | ND    | 2.3   | 1.0   | 0.5   | 0.4   | ND    | ND    | ND    | ND    | ND    |
| 123478/123678-HxBDD              | ND    | ND    | 2.2   | 1.4   | 0.6   | 0.5   | ND    | 0.5   | ND    | ND    | ND    | ND    |
| 123789-HxBDD                     | ND    | 3.6   | 1.8   | 0.9   | 0.6   | 0.5   | 0.3   | 1.0   | ND    | ND    | ND    | ND    |
| $\Sigma$ 2378-PBDD/Fs            | 63.1  | 105.5 | 142.7 | 66.0  | 64.6  | 35.2  | 29.3  | 15.0  | 12.9  | 15.0  | 13.9  | 16.6  |
| I-TEQ (PBDD/Fs)                  | 13.9  | 21.9  | 28.2  | 17.2  | 14.2  | 8.3   | 6.8   | 3.3   | 3.0   | 3.5   | 3.2   | 3.9   |
| $\Sigma$ 2378-PCDD/Fs            | 659   | 437   | 503   | 207   | —     | 249   | 380   | 219   | 254   | 472   | 387   | 580   |
| $\Sigma$ PCDD/Fs                 | 2347  | 1444  | 1381  | 1756  | —     | 843   | 764   | 678   | 706   | 1288  | 1299  | 1949  |
| WHO <sub>98</sub> -TEQ (PCDD/Fs) | 36.3  | 24.6  | 21.5  | 25.3  | —     | 12.8  | 8.2   | 9.2   | 7.4   | 16.8  | 18.1  | 27.2  |
| I-TEQ (PCDD/Fs)                  | 33.1  | 23.1  | 20.1  | 23.4  | —     | 11.6  | 7.8   | 8.4   | 6.9   | 15.6  | 16.5  | 24.7  |

Continued

| Time (month/year)                | 04/05 | 05/05 | 06/05 | 07/05 | 08/05 | 09/05 | 10/05 | 11/05 | 12/05 | 01/06 | 02/06 | 03/06 |
|----------------------------------|-------|-------|-------|-------|-------|-------|-------|-------|-------|-------|-------|-------|
| Sample No.                       | Cb4   | Cb5   | Cb6   | Cb7   | Cb8   | Cb9   | Cb10  | Cb11  | Cb12  | Cb13  | Cb14  | Cb15  |
| 2378-TBDF                        | 17.5  | 39.5  | 28.9  | 28.0  | 35.0  | 13.7  | 16.9  | 5.8   | 6.8   | 5.1   | 5.3   | 6.4   |
| 12378-PeBDF                      | 8.0   | 12.4  | 9.4   | 11.3  | 14.1  | 5.6   | 8.3   | 2.6   | 2.7   | 2.0   | 3.5   | 3.1   |
| 23478-PeBDF                      | 12.2  | 15.8  | 18.2  | 10.6  | 13.2  | 8.0   | 8.2   | 3.7   | 3.4   | 2.6   | 5.0   | 4.2   |
| 2378-TBDD                        | 0.5   | 1.8   | 0.7   | 3.4   | 4.2   | 0.5   | 0.3   | 0.1   | 0.4   | 0.3   | 0.1   | 0.2   |
| 12378-PeBDD                      | 0.3   | 0.5   | 0.9   | 1.6   | 2.0   | 0.5   | ND    | 0.2   | 0.2   | 0.2   | 0.2   | 0.4   |
| 123478/123678-HxBDD              | 0.3   | ND    | ND    | 0.5   | 0.6   | 0.3   | 0.8   | 1.2   | 0.1   | 0.1   | 0.3   | 0.2   |
| 123789-HxBDD                     | 0.5   | 1.5   | 0.6   | 1.7   | 2.2   | ND    | 0.6   | 1.0   | 0.3   | 0.2   | 0.1   | 0.1   |
| ∑2378-PBDD/Fs                    | 39.3  | 71.4  | 58.6  | 57.1  | 71.3  | 28.6  | 35.0  | 14.6  | 14.0  | 10.5  | 14.6  | 14.5  |
| I-TEQ (PBDD/Fs)                  | 9.0   | 14.6  | 13.6  | 13.1  | 16.3  | 6.5   | 6.7   | 3.0   | 3.1   | 2.3   | 3.5   | 3.3   |
| ∑2378-PCDD/Fs                    | 383   | 462   | —     | —     | 436   | 236   | 161   | 257   | 175   | 359   | 612   | 504   |
| ∑PCDD/Fs                         | 1271  | 1510  | —     | —     | 2784  | 633   | 408   | 631   | 405   | 785   | 1663  | 1649  |
| WHO <sub>98</sub> -TEQ (PCDD/Fs) | 18.9  | 24.0  | —     | —     | 42.0  | 10.5  | 6.8   | 9.4   | 4.8   | 8.3   | 21.9  | 21.9  |
| I-TEQ (PCDD/Fs)                  | 17.1  | 22.0  | —     | —     | 39.0  | 9.5   | 6.4   | 8.7   | 4.4   | 7.9   | 20.2  | 19.7  |

<sup>a</sup> —: PCDD/Fs were not analyzed. ND: not detected.

**Table S2. Relative proportion (%) of PBDD/Fs in bulk deposition and sources**

|                | Bulk deposition <sup>a</sup> | E-waste air <sup>b</sup> | Stack flue gas    |                    |                          |                                |                                   |
|----------------|------------------------------|--------------------------|-------------------|--------------------|--------------------------|--------------------------------|-----------------------------------|
|                |                              |                          | IWIs <sup>c</sup> | MSWIs <sup>c</sup> | Batch MSWIs <sup>c</sup> | Carbon steel EAFs <sup>d</sup> | Stainless steel EAFs <sup>d</sup> |
| 2378-TBDF      | 45                           | 49                       | 42                | 15                 | 13                       | 11                             | 17                                |
| 12378-PeBDF    | 20                           | 19                       | 23                | 11                 | 12                       | 12                             | 12                                |
| 23478-PeBDF    | 28                           | 22                       | 23                | 27                 | 22                       | 10                             | 28                                |
| 2378-TBDD      | 1.8                          | 3.2                      | 4.5               | 2.8                | 2.2                      | 4.0                            | 4.2                               |
| 12378-PeBDD    | 1.2                          | 2.8                      | 5.5               | 4.5                | 11                       | 5.8                            | 12                                |
| 1234/678-HxBDD | 1.6                          | 2.6                      | 2.4               | 30                 | 25                       | 46                             | 18                                |
| 123789-HxBDD   | 1.8                          | 1.5                      | 3.9               | 13                 | 14                       | 11                             | 8.4                               |

<sup>a</sup> this study. <sup>b</sup> data from ref 10. <sup>c</sup> data from ref 11. <sup>d</sup> data from ref 12.
